# Supplementary material for: Risk factors of delayed bleeding after endoscopic mucosal dissection in patients with early esophageal cancer
Source: Research Square preprint supplement (doi:10.21203/rs.3.rs-4387314/v1), 2024-05-21
Supplement: Supplementary file 1 [file 72dd305c231693ab0012de79.xlsx]

## Sheet: Sheet1
Number	Age	Gender	Postoperative delayed bleeding	Combined with other systemic diseases	Tumor distribution	Intraoperative bleeding	Pathological type	Tumor diameter	History of anticoagulant or antiplatelet drug use	Tumor invasion depth
1	46	female	Yes	No	midesophagus	Yes	Intramucosal carcinoma	2	Yes	M3
2	52	female	No	Yes	Upper esophagus	Yes	Carcinoma in situ	2	No	M1
3	45	male	No	No	Lower esophagus	No	Submucous carcinoma	1	No	M2
4	50	male	Yes	Yes	Lower esophagus	No	Submucous carcinoma	3	No	M1
5	53	male	No	No	midesophagus	No	Submucous carcinoma	2	Yes	M3
6	52	male	Yes	No	Upper esophagus	Yes	Submucous carcinoma	4	Yes	M3
7	58	female	Yes	Yes	midesophagus	Yes	Carcinoma in situ	3	No	M3
8	46	male	No	Yes	Lower esophagus	No	Submucous carcinoma	3	No	M1
9	61	female	Yes	No	Upper esophagus	Yes	Submucous carcinoma	3	No	M2
10	43	female	No	No	Lower esophagus	No	Intramucosal carcinoma	2	No	M3
11	48	male	No	Yes	midesophagus	Yes	Carcinoma in situ	3	Yes	M3
12	60	female	No	Yes	midesophagus	No	Intramucosal carcinoma	1	No	M1
13	44	male	Yes	Yes	midesophagus	Yes	Submucous carcinoma	1	Yes	M2
14	56	male	No	No	Lower esophagus	No	Intramucosal carcinoma	3	No	M3
15	40	female	No	No	Upper esophagus	Yes	Carcinoma in situ	2	Yes	M1
16	53	female	Yes	No	Lower esophagus	No	Carcinoma in situ	4	No	M3
17	48	male	No	No	midesophagus	No	Submucous carcinoma	2	No	M2
18	46	male	No	Yes	Lower esophagus	Yes	Carcinoma in situ	3	Yes	M1
19	54	male	No	Yes	Upper esophagus	No	Submucous carcinoma	3	Yes	M1
20	65	male	Yes	Yes	midesophagus	Yes	Submucous carcinoma	3	Yes	M3
21	46	male	No	Yes	midesophagus	No	Submucous carcinoma	2	No	M2
22	62	female	No	No	Lower esophagus	Yes	Intramucosal carcinoma	5	No	M1
23	53	male	No	Yes	Upper esophagus	Yes	Carcinoma in situ	3	No	M3
24	51	female	No	Yes	midesophagus	Yes	Intramucosal carcinoma	1	Yes	M1
25	38	female	Yes	No	Lower esophagus	Yes	Intramucosal carcinoma	1	No	M3
26	61	female	No	No	Lower esophagus	No	Intramucosal carcinoma	2	No	M3
27	43	male	No	Yes	midesophagus	Yes	Submucous carcinoma	2	Yes	M1
28	60	female	No	Yes	Upper esophagus	Yes	Carcinoma in situ	3	Yes	M2
29	40	female	No	Yes	Lower esophagus	No	Submucous carcinoma	2	No	M1
30	40	male	No	No	Upper esophagus	Yes	Carcinoma in situ	5	Yes	M3
31	55	female	Yes	No	Upper esophagus	No	Carcinoma in situ	3	Yes	M3
32	60	male	No	Yes	Lower esophagus	Yes	Intramucosal carcinoma	4	No	M1
33	58	male	No	No	midesophagus	No	Intramucosal carcinoma	3	Yes	M2
34	45	male	Yes	No	Lower esophagus	Yes	Submucous carcinoma	3	Yes	M3
35	46	male	No	Yes	Lower esophagus	No	Submucous carcinoma	3	Yes	M1
36	53	female	No	No	Upper esophagus	Yes	Carcinoma in situ	4	Yes	M3
37	55	male	No	Yes	midesophagus	No	Submucous carcinoma	2	No	M2
38	58	female	Yes	Yes	Upper esophagus	Yes	Submucous carcinoma	4	No	M1
39	43	male	No	No	Lower esophagus	No	Submucous carcinoma	2	No	M2
40	60	female	No	No	midesophagus	Yes	Carcinoma in situ	4	Yes	M3
41	49	male	Yes	Yes	Lower esophagus	Yes	Intramucosal carcinoma	2	Yes	M3
42	48	male	No	Yes	Upper esophagus	No	Submucous carcinoma	2	No	M2
43	54	female	No	Yes	Lower esophagus	Yes	Intramucosal carcinoma	5	No	M1
44	43	male	No	No	midesophagus	Yes	Carcinoma in situ	1	Yes	M2
45	40	female	Yes	No	midesophagus	No	Carcinoma in situ	4	No	M3
46	54	female	No	No	midesophagus	No	Submucous carcinoma	2	No	M3
47	53	male	No	Yes	midesophagus	Yes	Carcinoma in situ	3	Yes	M1
48	45	male	No	No	Upper esophagus	No	Submucous carcinoma	1	No	M2
49	59	male	Yes	No	Lower esophagus	Yes	Intramucosal carcinoma	3	Yes	M3
50	40	male	No	No	Lower esophagus	No	Intramucosal carcinoma	1	Yes	M2
51	50	female	No	No	Upper esophagus	Yes	Carcinoma in situ	2	No	M1
52	66	male	Yes	Yes	Upper esophagus	Yes	Submucous carcinoma	2	No	M3
53	48	female	No	No	midesophagus	No	Intramucosal carcinoma	1	Yes	M3
54	45	female	No	Yes	Upper esophagus	Yes	Submucous carcinoma	2	No	M2
55	52	male	No	No	midesophagus	No	Carcinoma in situ	3	Yes	M3
56	52	male	Yes	Yes	Upper esophagus	No	Carcinoma in situ	1	Yes	M3
57	53	male	No	Yes	midesophagus	No	Intramucosal carcinoma	3	No	M2
58	52	female	No	No	Upper esophagus	Yes	Submucous carcinoma	2	Yes	M3
59	56	male	Yes	Yes	Lower esophagus	Yes	Intramucosal carcinoma	5	Yes	M2
60	43	male	No	No	Upper esophagus	Yes	Intramucosal carcinoma	3	No	M3
